# Supplementary material for: Chalcogen (S, Se, and Te) decorated few-layered Ti3C2Tx MXene hybrids: modulation of properties through covalent bonding
Source: Royal Society of Chemistry journal article supplement (doi:10.1039/d2nr05730a), 2023-01-01
Supplement: d2nr05730a1.pdf [file d2nr05730a1.pdf]

## Supporting Information

### Chalcogen (S, Se, and Te) decorated few-layered $\text{Ti}_3\text{C}_2\text{T}_x$ MXene hybrids: modulation of properties through covalent bonding

Jalal Azadmanjiri\*, Pradip Kumar Roy, Lukáš Děkanovský, and Zdeněk Sofer\*

Department of Inorganic Chemistry, University of Chemistry and Technology Prague, Technická  
5, 166 28 Prague 6, Czech Republic

\*Corresponding authors: jalal\_azad2000@yahoo.com, jalal.azadmanjiri@vscht.cz (Jalal Azadmanjiri) and zdenek.sofer@vscht.cz (Zdeněk Sofer)

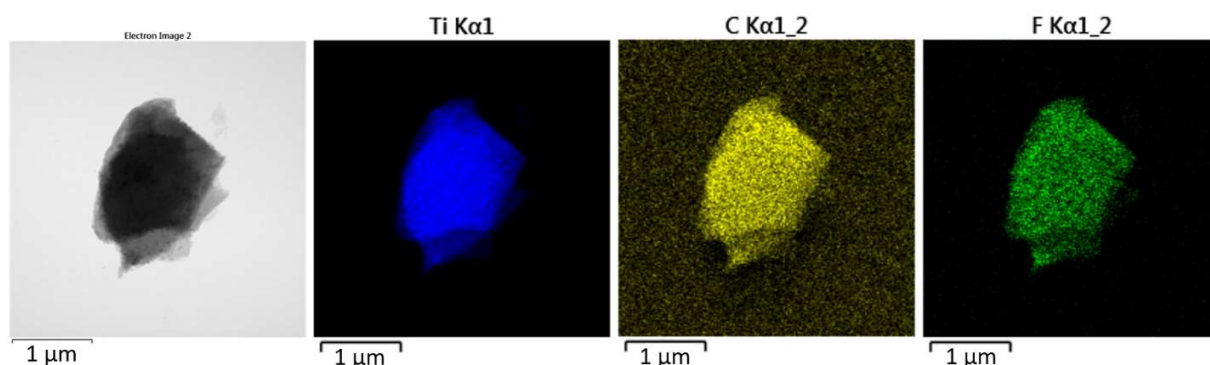

Figure S1. TEM and elemental mappings of synthesized  $\text{Ti}_3\text{C}_2\text{T}_x$  MXene.

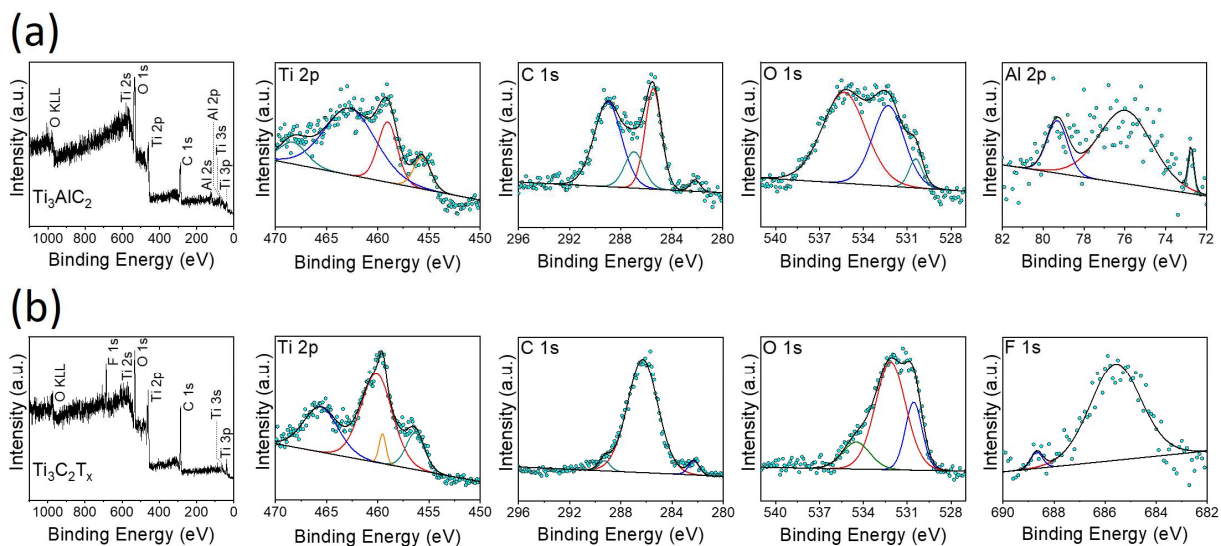

Figure S2. XPS survey and high-resolution spectrums of (a)  $\text{Ti}_3\text{AlC}_2$  and (b)  $\text{Ti}_3\text{C}_2\text{T}_x$  samples.

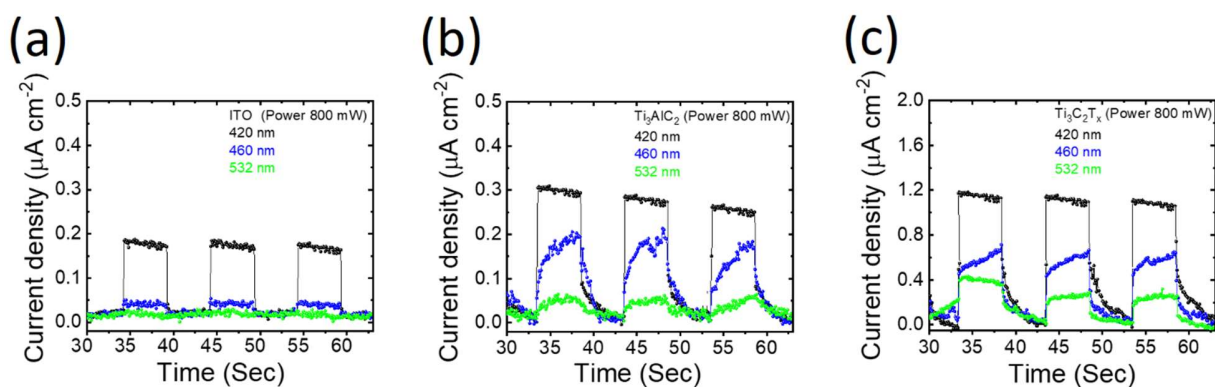

Figure S3. Power dependence of the photocurrent density under the illumination of 420 nm, 460 nm, and 532 nm LED sources in 1 M KOH solution at 1.25 V vs SCE for (a) blank ITO, (b)  $\text{Ti}_3\text{AlC}_2$ , and (c)  $\text{Ti}_3\text{C}_2\text{T}_x$  samples.

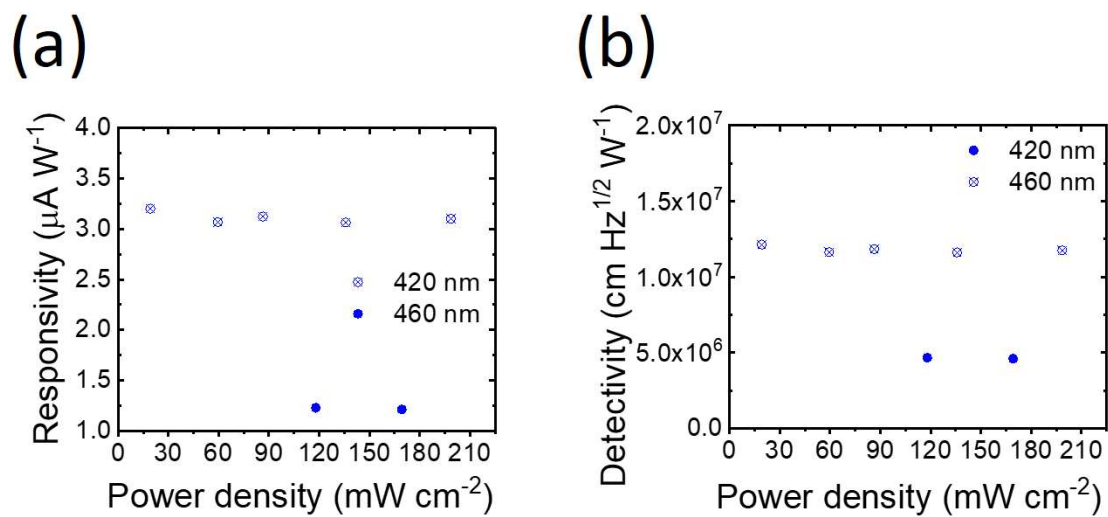

Figure S4. The responsivity (a) and detectivity (b) of blank  $\text{Ti}_3\text{C}_2\text{T}_x$  PEC photodetector in 1 M KOH solution as a function of power density upon illumination wavelengths of 420 nm and 460 nm LED sources.
